## P5450

# Evening levels and circadian changes of salivary cortisol predict adverse events in heart failure patients with comorbid depression - a MOOD-HF substudy

L. Barthel<sup>1</sup>, M. Kroiss<sup>2</sup>, S. Sehner<sup>3</sup>, S. Lezius<sup>3</sup>, H. Gunold<sup>4</sup>, F. Edelmann<sup>5</sup>, R. Wachter<sup>6</sup>, T. Graf<sup>7</sup>, S. Pankuweit<sup>8</sup>, D. Knappe<sup>9</sup>, S. Stork<sup>10</sup>, J. Deckert<sup>11</sup>, G. Ertl<sup>12</sup>, M. Fassnacht<sup>2</sup>, C.E. Angermann<sup>10</sup>

<sup>1</sup>University Hospital Würzburg, Comprehensive Heart Failure Center, Würzburg, Germany; <sup>2</sup>University Hospital Würzburg, Department of Medicine I, Endocrinology, Würzburg, Germany; <sup>3</sup>University Medical Center Hamburg Eppendorf, Department of Biometry and Epidemiology, Hamburg, Germany; <sup>4</sup>University Hospital Leipzig, Department of Medicine and Cardiology and Heart Center, Leipzig, Germany; <sup>5</sup>University Hospital Berlin, Department of Internal Medicine, Cardiology, Charité – Campus Virchow-Klinikum, Berlin, Germany; <sup>6</sup>University Hospital Leipzig, Department of Cardiology, Leipzig, Germany; <sup>7</sup>University Hospital Lübeck, Department of Medicine II, Cardiology, Lübeck, Germany; <sup>8</sup>University Hospital Marburg, Department of Cardiology, Marburg, Germany; <sup>9</sup>University Heart Center Hamburg, Hamburg, Germany; <sup>10</sup>University Hospital Würzburg, Comprehensive Heart Failure Center and Department of Medicine I, Würzburg, Germany; <sup>11</sup>University Hospital Würzburg, Department of Psychiatry, Psychosomatic Medicine and Psychotherapy, Center of Mental Health, Würzburg, Germany; <sup>12</sup>University Hospital Würzburg, Würzburg, Germany

**Funding Acknowledgement:** BMBF (Grant 01 KG0702) and Lundbeck A/S Denmark

**Background:** Depression is frequent in heart failure (HF) and associated with adverse clinical outcomes. The randomized MOOD-HF trial showed that in depressed patients with systolic heart failure (HF) the selective serotonin reuptake inhibitor escitalopram (E) improved neither survival nor depression compared to placebo (P). The hypothalamic-pituitary-adrenocortical axis is known to be altered in depression or HF. This MOOD-HF substudy aimed to clarify whether circadian salivary cortisol levels (SCL) were predictive of adverse events in depressed MOOD-HF participants and whether outcomes differed according to treatment with E.

**Methods:** MOOD-HF participants (all suffering from symptomatic systolic HF with left ventricular ejection fraction (LVEF) <45% and current major depression) were eligible for the present analysis if providing samples for SCL determination (luminescence immunoassay) at baseline visit (BL) and if not on oral glucocorticosteroid therapy. Depression severity was determined with the Montgomery-Åsberg Depression Rating Scale (MADRS) and LVEF measured by echocardiography.

**Results:** In the total study cohort (146 patients on E, 147 on P) median morning SCL at BL was 0.210 µg/dL (IQR 0.141–0.338 µg/dL) and median evening (pm) SCL 0.067 µg/dL (0.036–0.128 µg/dL,  $p < 0.001$ ). Median circadian change was 0.124 µg/dL (0.044–0.239 µg/dL). In patients with BL pm-SCL above the median MADRS-score was 21.7±9.1 and LVEF 33.7±8.4% respectively, in patients with pm-SCL below the median these values were 19.6±9.1 and 36.5±7.8% ( $p = 0.048$ ;  $p = 0.004$ ).

During 12 months follow-up the composite endpoint (all-cause death or re-hospitalization) occurred least in E-treated patients with low pm-SCL and most often in E-treated patients with high pm-SCL (HR 2.02, 95% CI 1.12–3.65,  $p = 0.010$ ); patients on P had comparable event rates irrespective of BL pm-SCL (Figure A). Thus, numerically patients on E with low BL pm-SCL had lower event rates compared with corresponding P-treated patients (HR 0.76 (0.41–1.40,  $p = 0.796$ )), while patients with high BL pm-SCL had higher event rates (HR 1.29 (0.74–2.24,  $p = 0.799$ )) than corresponding P-treated patients. Patients with circadian SCL changes above the median receiving P experienced the composite primary endpoint least, while both subgroups with circadian SCL changes below the median and also patients with circadian SCL changes above the median on E had higher event rates (HR 0.66 (0.45–0.97,  $p = 0.039$ ), Figure B).

**Conclusion:** In depressed patients with systolic HF high pm-SCL are associated with more severe disease (depression and cardiac dysfunction). Extending primary MOOD-HF results indicating unfavourable outcomes related to E, the current findings suggest a SCL x treatment interaction with higher event rates in (sicker) patients with high pm-SCL and lower event rates in (less sick) patients with low pm-SCL when treated with the antidepressant. Low circadian changes of SCL were always associated with higher event rates.

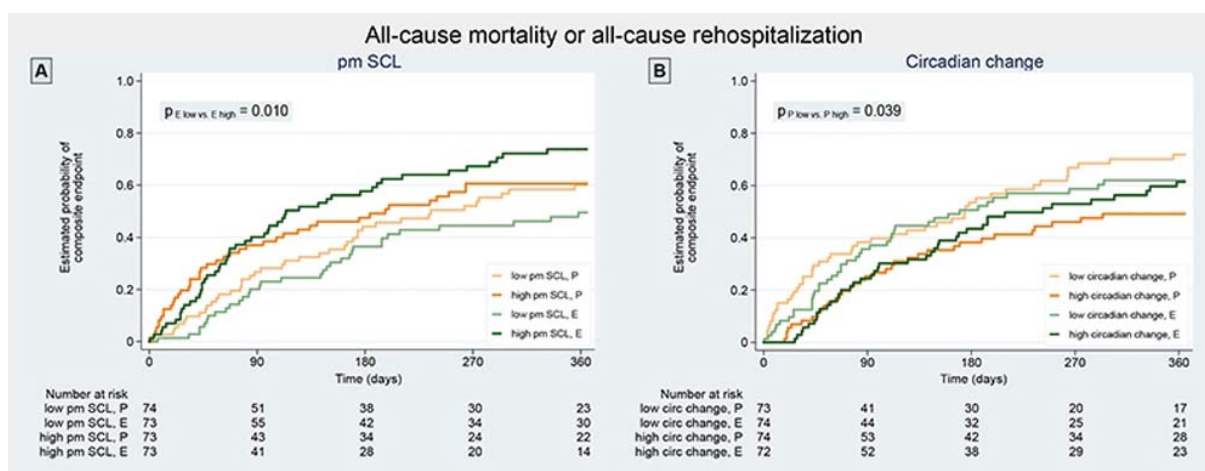

Source: http://academic.oup.com/eurheartj/article-pdf/40/Supplement_1/ehz746.0406/30200781/ehz746.0406.pdf
